# Supplementary material for: Arabidopsis endoplasmic reticulum-localized acyltransferase LPAT2 interacts with ATI1/2 and mediates lipid droplet proliferation
Source: Research Square preprint supplement (doi:10.21203/rs.3.rs-3939299/v1), 2024-02-27
Supplement: Supplementary file 1 [file e6d93fac6d6b8d6e5b938136.xlsx]

## Sheet: Sheet1
Primer name	Sequence	Usage
pGBKT7-LPAT1-LP	GCCATGGAGGCCGAATTCATGGATGTCGCTTCTGCTCGGAG	Plasmid construction for yeast two hybrid assay
pGBKT7-LPAT1-RP	AGGTCGACGGATCCCCGGTTAGAGATCCATTGATTCTGCA
pGBKT7-LPAT2-LP	GCCATGGAGGCCGAATTCATGGTGATTGCTGCAGCTGTCATC
pGBKT7-LPAT2-RP	AGGTCGACGGATCCCCGGTTACTTCTCCTTCTCCGTTTCTG
pGADT7-ATI1-LP	GACGTACCAGATTACGCTATGGCTAACAATGAGGA
pGADT7-ATI1-RP	GGCCTCCATGGCCATATGCTAGACCTCACTGGAGGA
pGADT7-ATI2-LP	GACGTACCAGATTACGCTATGGCTGACAAAGATGAAGCAG
pGADT7-ATI2-RP	GGCCTCCATGGCCATATGTTAACGGTCGTTTTGGGCGCTG
GST-LPAT1-448-657-LP	CGTGGATCCCCGGAATTCATGCCGTTCGTCCTTCTC	Plasmid construction for Pull-down assay
GST-LPAT1-448-657-RP	GAGTCGACCCGGGAATTCTTACTTAAAGCTTTTTCC
GST-LPAT2-100-918-LP	CGTGGATCCCCGGAATTCATGCGACCACTGTCTAAG
GST-LPAT2-100-918-RP	GAGTCGACCCGGGAATTCTTACGCAAGGGACTTTAT
pCold1-ATI2 1-570-LP	ACCCTCGAGGGATCCGAATTCATGGCTGACAAAGATGAA
pCold1-ATI2 1-570-RP	CAGGTCGACAAGCTTGAATTCTTATTCTTTCGCTTGGGC
p2YN-LPAT1-LP	CGATAGTTAATTAACATGGATGTCGCTTCTGCTCG	Plasmid construction for Bifc assay
p2YN-LPAT1-RP	ACCTCCTCCACTAGTGAGATCCATTGATTCTGCAAT
p2YN-LPAT2-LP	CGATAGTTAATTAACATGGTGATTGCTGCAGCTGTCATC
p2YN-LPAT2-RP	ACCTCCTCCACTAGTCTTCTCCTTCTCCGTTTCTG
p2YC-ATI2-LP	CGATAGTTAATTAACATGGCTGACAAAGATGAAGCAG
p2YC-ATI2-RP	ACCTCCTCCACTAGTACGGTCGTTTTGGGCGCTG
pCAMBIA1300-LPAT2-nLUC-LP	AACACGGGGGACGAGCTCGGTACCATGGTGATTGCTGCAGCTGTCATC	Plasmid construction for LCI assay
pCAMBIA1300-LPAT2-nLUC-RP	CGCGTACGAGATCTGGTCGACCTTCTCCTTCTCCGTTTCTG
pCAMBIA1300-Cluc-ATI2-LP	TCGTACGCGTCCCGGGGCGGTACCATGGCTGACAAAGATGAA
pCAMBIA1300-Cluc-ATI2-RP	TCCATTTGTTGGATCCCGGGTACCTTAACGGTCGTTTTGGGC
pCM1307-Flag-ATI1-F	GGCCGCTCTAGAACTAGTATGGCTAACAATGAGGAGCA	Plasmid construction for CO-IP assay
pCM1307-Flag-ATI1-R	CCCGGGGGATCCACTAGTGACCTCACTGGAGGAGCCAC
pCM1307-Flag-ATI2-F	GGCCGCTCTAGAACTAGTATGGCTGACAAAGATGAAGC
pCM1307-Flag-ATI2-R	CCCGGGGGATCCACTAGTACGGTCGTTTTGGGCGCTGG
I miR-S LPAT2-RNAi	gaTAGTACATAGCAAACTGCCTTtctctcttttgtattcc	Plasmid construction for LPAT2-RNAi transgenic plants generation
II miR-a LPAT2-RNAi	gaAAGGCAGTTTGCTATGTACTAtcaaagagaatcaatga
III miR*s LPAT2-RNAi	gaAAAGCAGTTTGCTTTGTACTTtcacaggtcgtgatatg
IV miR*a LPAT2-RNAi	gaAAGTACAAAGCAAACTGCTTTtctacatatatattcct
olig A	CTGCAAGGCGATTAAGTTGGGTAAC
olig B	GCGGATAACAATTTCACACAGGAAACAG
320-RT-1F	GCCTTTGGGCCTTCTCTTCT	Quantitative real-time PCR
320-RT-1R:	TTTCTGCAACCACCCGGTTA
320-RT-2LP	CAGCTGTCATCGTGCCTTTG
320-RT-2RP	ACAAGCTCCAACCACAAGGT
ACTIN7-LP	CCGGTATTGTGCTCGATTCTG
ACTIN7-RP	TTCCCGTTCTGCGGTAGTGG
pCM1307-LPAT1-GFP-LP	GCGGCCGCTCTAGAATGGATGTCGCTTCTGCT	Plasmid construction for Subcellular localization
pCM1307-LPAT1-GFP-RP	ATCCACTAGTTCTAGAGAGATCCATTGATTCTGC
pCM1307-LPAT2-GFP-LP	GCGGCCGCTCTAGAATGGTGATTGCTGCAGCT
pCM1307-LPAT2-GFP-RP	ATCCACTAGTTCTAGACTTCTCCTTCTCCGTTTCTG
pCM1307-LPAT3-GFP-LP	GCGGCCGCTCTAGAATGAAGATCCCTGCGGCT
pCM1307-LPAT3-GFP-RP	ATCCACTAGTTCTAGAAGCAGAAATAAGCTGTTC
pCM1307-LPAT4-GFP-LP	GCGGCCGCTCTAGAATGGAAGTTTGCGGGGATCTGA
pCM1307-LPAT4-GFP-RP	ATCCACTAGTTCTAGAATGGTTTTTAACTTTACAAGAA
pCM1307-LPAT5-GFP-LP	GCGGCCGCTCTAGAATGGAAAAAAAGAGTGTACCAA
pCM1307-LPAT5-GFP-RP	ATCCACTAGTTCTAGATTTGTTTACTAATTTGAGGGAA
pCAMBIA1301-UBQ10-LDAP1-mCherry-LP	CTCGGTACCCGGGGATCCATGGAGACAGAGAAGAAA
pCAMBIA1301-UBQ10-LDAP1-mCherry-RP	GTCGACTCTAGAGGATCCCTCCGAATCAGACGATGA
LBb1	GCGTGGACCGCTTGCTGCAACT	Genotyping
LBb1.3	ATTTTGCCGATTTCGGAAC
LBba1	TGGTTCACGTAGTGGGCCATCG
LB_6313R	TCAAACAGGATTTTCGCCTGCT
Lpat3 SALK_046680C-LP	GAAAGCCATTGCAGTAGCTTG
Lpat3 SALK_046680C-RP	CGTGTAGGTTGTCTTGGAAGC
Lpat4 SALK_115626C-LP	CTGGAAGACCAACTTCAGCTG
Lpat4 SALK_115626C-RP	AATTTGCAACCTTTTTCCCAC
Lpat5 SALK_101956C-LP	GTTTCCTTCTTCTTTGGCTCG
Lpat5 SALK_101956C-RP	GATTGAAATGCGTAGCAGAGG
LBb1.3	ATTTTGCCGATTTCGGAAC
ati1cLP	ACCAGAATGGCTCGTGTATTG
ati1cRP	AGGAGCCACTCCTTACGAGAG
ATI2Crispr_LP	ATGGCTGACAAAGATGAAGCAGCGA
ATI2Crispr_RP	ATCTGCCACCTCTCCTGTTGCCA
pCAMBIA1301-UBQ10-LPAT2-LP	CTGCAGGCATGCAAGCTTATGGTGATTGCTGCAGCT	Plasmid construction for transgenic plants generation
pCAMBIA1301-UBQ10-LPAT2-RP	GAAATTCGAGCTGGTCACCTTACTTCTCCTTCTCCGTTTC
pCAMBIA1301-UBQ10-mCherry-LPAT2-LP	CTCGGTACCCGGGGATCCATGGTGAGCAAGGGCGAG
pCAMBIA1301-UBQ10-mCherry-LPAT2-RP	GTCGACTCTAGAGGATCCCTTGTACAGCTCGTCCAT
pCAMBIA1301-UBQ10-mCherry-LP	CTGCAGGCATGCAAGCTTATGGTGAGCAAGGGCGAG
pCAMBIA1301-UBQ10-mCherry-RP	GAAATTCGAGCTGGTCACCCTACTTGTACAGCTCGTCCAT
pCAMBIA1301-UBQ-GFP-ATI2-LP	GACCTGCAGGCATGCAAGCTTATGGCTGACAAAGATGAA
pCAMBIA1301-UBQ-GFP-ATI2-RP	GGGGAAATTCGAGCTGGTGACCTTAACGGTCGTTTTGGGCGCT
